# Supplementary material for: Transient phase transition during the hydrogen evolution reaction
Source: Royal Society of Chemistry journal article supplement (doi:10.1039/d3ee01409f), 2023-01-01
Supplement: d3ee01409f1.pdf [file d3ee01409f1.pdf]

## Supplementary information

for

### Transient phase transition during the hydrogen evolution reaction

Yinghe Zhao,<sup>‡\*</sup> Haobo Li,<sup>‡<sup>a</sup></sup> Ruouou Yang,<sup>‡<sup>a</sup></sup> Shuxian Xie,<sup>b</sup> Teng Liu,<sup>a</sup> Pengyu Li,<sup>a</sup>

Youwen Liu,<sup>a</sup> Huiqiao Li,<sup>a</sup> Fa Yang<sup>\*b</sup> and Tianyou Zhai\*

<sup>a</sup> State Key Laboratory of Materials Processing and Die & Mould Technology, School of Materials Science and Engineering, Huazhong University of Science and Technology, Wuhan, Hubei 430074, China

<sup>b</sup> Key Laboratory of the Ministry of Education for Advanced Catalysis Materials, College of Chemistry and Materials Science, Zhejiang Normal University, Jinhua, Zhejiang 321004, China

<sup>‡</sup> Yinghe Zhao, Haobo Li and Ruouou Yang contributed equally to this work.

\* E-mail: zhaoyh@hust.edu.cn; yangfa@zjnu.edu.cn; zhaity@hust.edu.cn

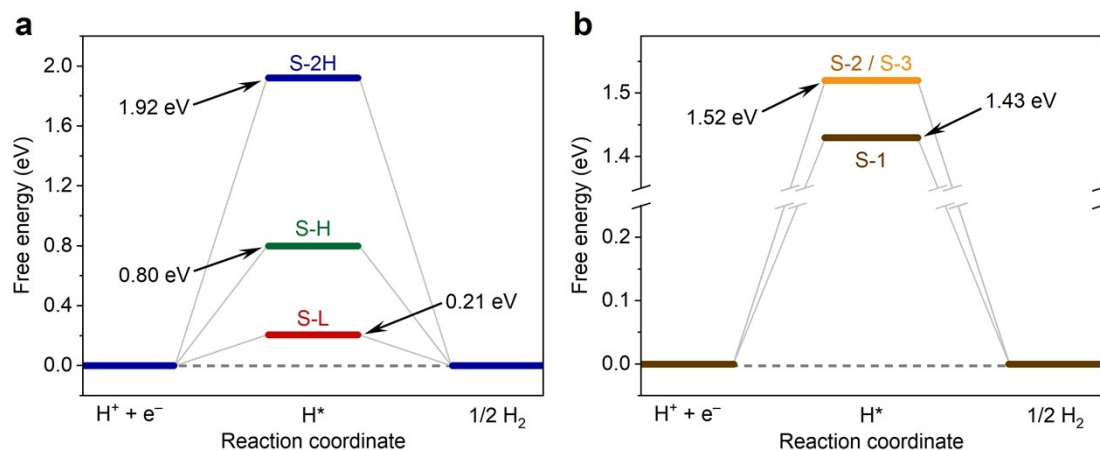

**Fig. S1** (a) Free energy diagrams of the HER proceeding on 2H-MoS<sub>2</sub> and 1T'-MoS<sub>2</sub> at  $U = 0$  V. S-2H represents the surface S atom of 2H-MoS<sub>2</sub>, and S-H and S-L denote the S atoms of 1T'-MoS<sub>2</sub> at the higher and lower positions. The diagrams were calculated based on the  $2 \times 2 \times 1$  2H-MoS<sub>2</sub> and  $2 \times 1 \times 1$  1T'-MoS<sub>2</sub> systems using a  $9 \times 9 \times 1$   $k$ -point grid. (b) Free energy diagrams of the HER proceeding on the S atoms adjacent to the vacancy (*i.e.*, S-1, S-2, and S-3) at  $U = 0$  V. The positions of S-1, S-2, and S-3 relative to the vacancy are presented in Fig. 3a. The diagrams were calculated based on the  $4 \times 4 \times 1$  2H-MoS<sub>2</sub> system using a  $5 \times 5 \times 1$   $k$ -point grid. By comparing the results in (a) and Fig. 1b and e, it can be concluded that the  $\Delta G_{\text{H}}$  value at a  $9 \times 9 \times 1$   $k$ -point grid is almost equal to that at a  $5 \times 5 \times 1$   $k$ -point grid. Therefore, the  $5 \times 5 \times 1$   $k$ -point grid is enough for the  $\Delta G_{\text{H}}$  calculation. Similarly, for the  $4 \times 4 \times 1$  2H-MoS<sub>2</sub> system, a  $3 \times 3 \times 1$   $k$ -point grid is enough for the  $\Delta G_{\text{H}}$  calculation, as can be concluded from the comparison of the  $\Delta G_{\text{H}}$  values in (b) and Fig. 3b.

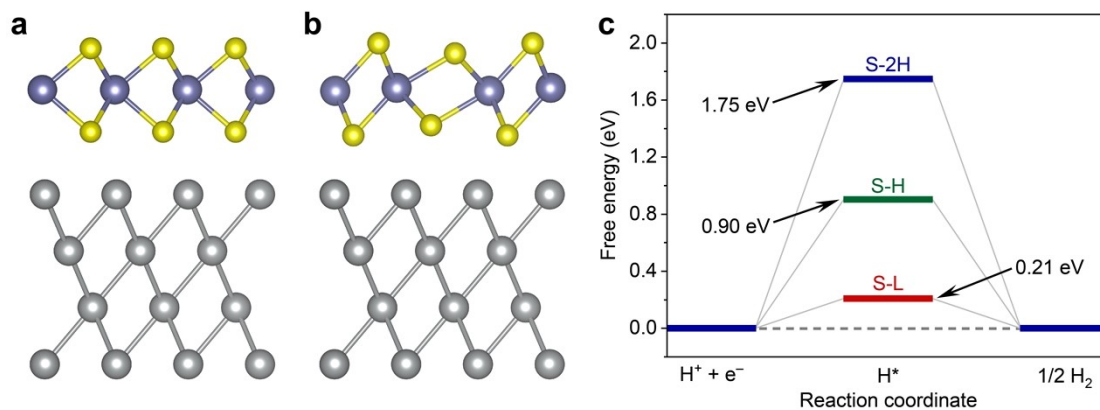

**Fig. S2** (a and b) Structures of 2H-MoS<sub>2</sub>/Ag and 1T'-MoS<sub>2</sub>/Ag heterostructures. (c) Free energy diagrams of the HER proceeding on the surface S atom of 2H-MoS<sub>2</sub> (S-2H) and the surface S atoms of 1T'-MoS<sub>2</sub> (S-H and S-L) at  $U = 0$  V. By comparing with the results in Fig. 2b and e, it can be concluded that the effect of Ag on the  $\Delta G_{\text{H}}$  of MoS<sub>2</sub> is slight. Additionally, even when Ag is taken into consideration, a rather negative potential is still required to drive the S-H bonding formation on 2H-MoS<sub>2</sub>, while a potential of ca.  $-0.2$  V enables the S-H bonding formation on S-L of 1T'-MoS<sub>2</sub>. The effect of Ag on the frequency of  $\nu(\text{S-H})$  is presented in Table S1. Based on the results in Fig. S2 and Table S1, it can be concluded that the 2H-to-1T' phase transition is a plausible explanation for an unclear experimental phenomenon: the S-H bonding formation was observed on the surface when using Ag@2H-MoS<sub>2</sub> to catalyse the HER (*J. Am. Chem. Soc.*, 2020, **142**, 7161–7167).

**Table S1** Theoretical values of the frequencies of  $\nu(\text{S-H})$  and  $\nu(\text{S-D})$  on the 2H-MoS<sub>2</sub>/Ag heterostructure and the 1T'-MoS<sub>2</sub>/Ag heterostructure. Mode I and Mode II represent the non-perpendicular and perpendicular adsorption modes, respectively (see Fig. 2d and e for the atomic arrangements of two modes). S-H and S-L denote the S atoms of 1T'-MoS<sub>2</sub> at the higher and lower positions. By comparing with the results in Fig. 2d,e, it can be concluded that Ag has a slight effect on the stretching frequency of the S-H bond. However, even when Ag is taken into consideration, the theoretical values of the frequencies of  $\nu(\text{S-H})$  and  $\nu(\text{S-D})$  on S-L are still in good agreement with the experimental values (2532 cm<sup>-1</sup> and 1823 cm<sup>-1</sup>, respectively; the values were obtained from the study by Chen et al. (*J. Am. Chem. Soc.*, 2020, **142**, 7161–7167)), while the corresponding theoretical values on 2H-MoS<sub>2</sub> still deviate significantly from the experimental values. The effect of Ag on the  $\Delta G_{\text{H}}$  of the surface atom is presented in Fig. S2. Based on the results in Fig. S2 and Table S1, it can be concluded that the 2H-to-1T' phase transition is a plausible explanation for an unclear experimental phenomenon: the S-H bonding formation was observed on the surface when using Ag@2H-MoS<sub>2</sub> to catalyse the HER (*J. Am. Chem. Soc.*, 2020, **142**, 7161–7167).

| Proton \ Adsorption   | 2H-MoS <sub>2</sub> |         | 1T'-MoS <sub>2</sub> |      |
|-----------------------|---------------------|---------|----------------------|------|
|                       | Mode I              | Mode II | S-H                  | S-L  |
| H (cm <sup>-1</sup> ) | 1907                | 2191    | 2448                 | 2556 |
| D (cm <sup>-1</sup> ) | 1364                | 1575    | 1756                 | 1834 |

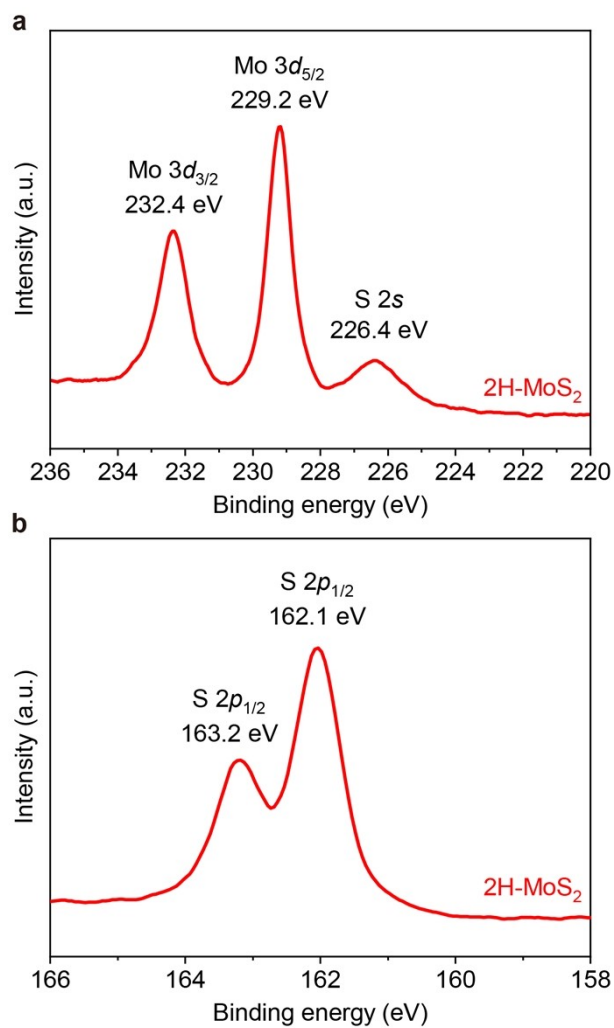

**Fig. S3** XPS spectra of Mo 3d states and S 2s and 2p states of MoS<sub>2</sub> (characterised by X-ray photoelectron spectroscopy (AXIS-ULTRA DLD-600W)).

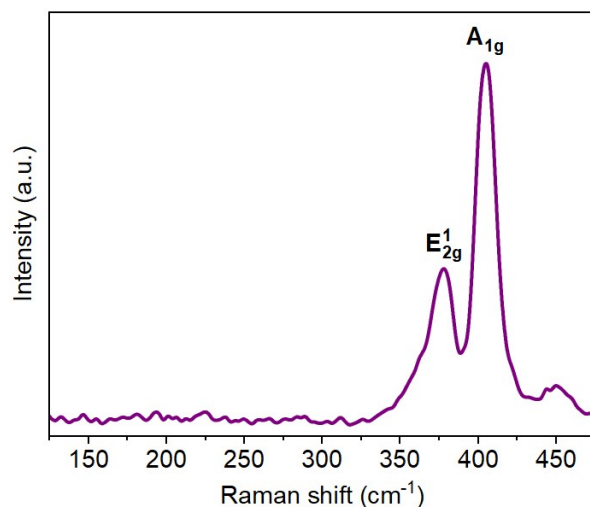

**Fig. S4** Raman spectrum of MoS<sub>2</sub> (characterized by a confocal Raman spectroscopy (Alpha300, WITec) with 532 nm laser source).

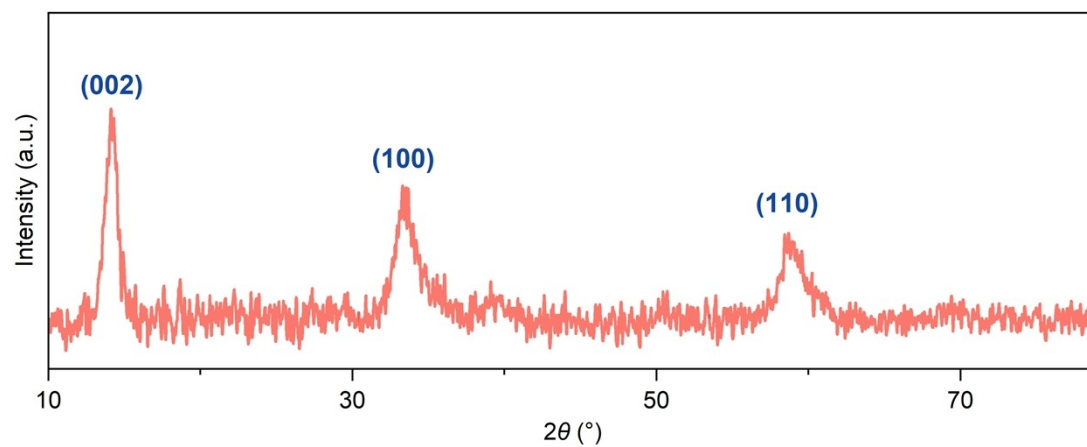

**Fig. S5** XRD pattern of MoS<sub>2</sub> (characterised by an X-ray diffractometer (D2 PHASER, Bruker, Cu K $\alpha$ ,  $\lambda = 1.5405 \text{ \AA}$ )).

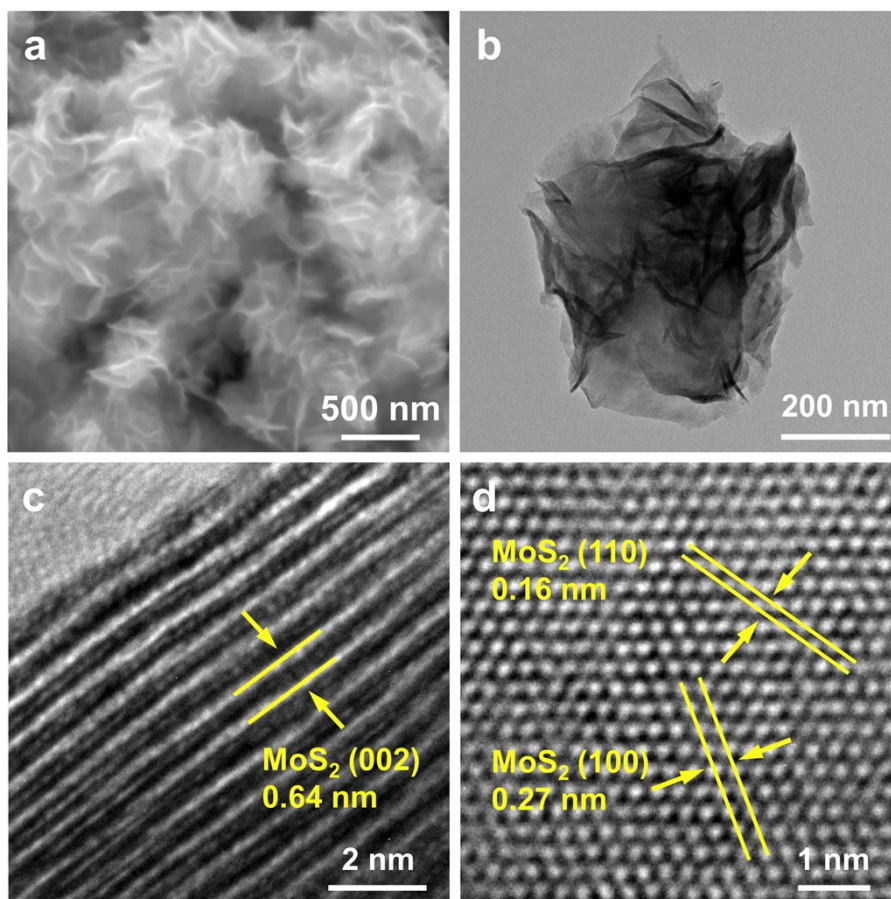

**Fig. S6** (a) Scanning electron microscopy (SEM), (b) transmission electron microscopy (TEM), and (c and d) high-resolution transmission electron microscopy (HRTEM) images of MoS<sub>2</sub>. The SEM image was obtained using a FEI quanta650 scanning electron microscope. The TEM and HRTEM images were obtained using a FEI Tecnai G2 F30 transmission electron microscope.



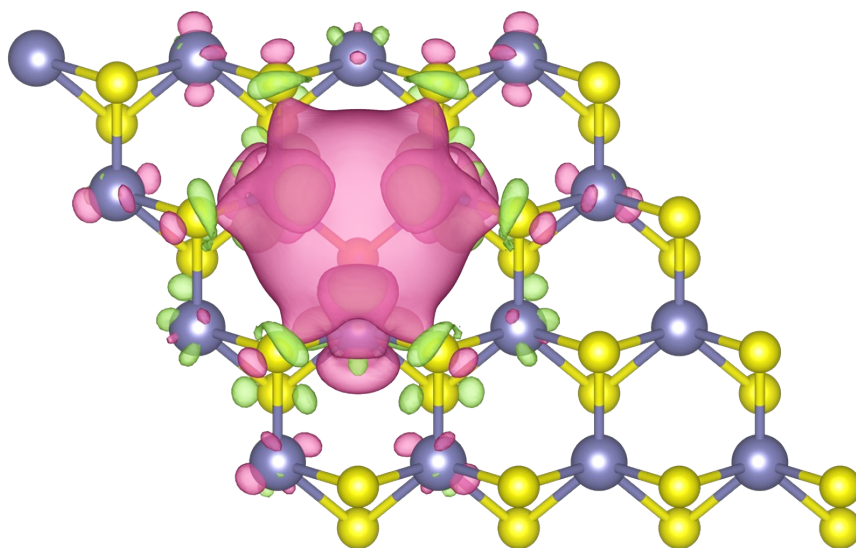

**Fig. S7** Charge density difference resulting from the generation of the S-vacancy. The isosurface level is set to be  $0.0006 \text{ e/Bohr}^3$ .

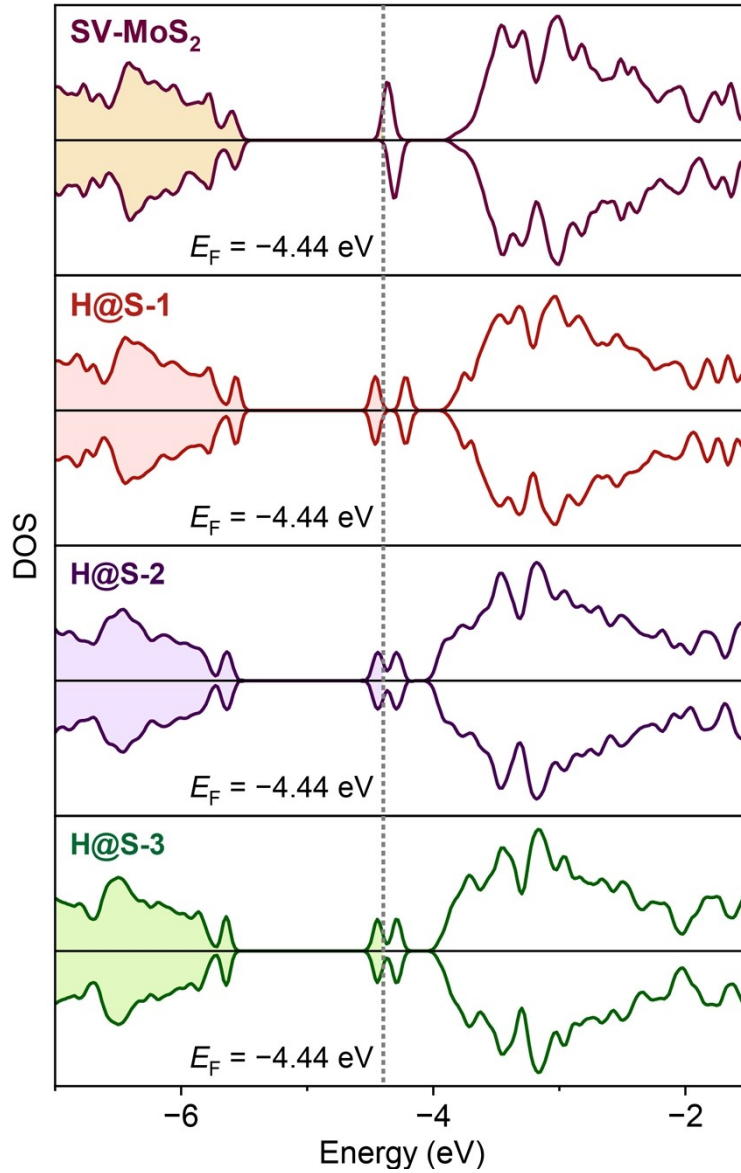

**Fig. S8** Densities of states of SV-MoS<sub>2</sub>, H@S-1, H@S-2, and H@S-3 at  $U = 0$  V, where the Fermi level is denoted as  $E_F$ . SV-MoS<sub>2</sub> represents 2H-MoS<sub>2</sub> with a S-vacancy (Fig. 2a). H@S-1, H@S-2, and H@S-3 represent SV-MoS<sub>2</sub> with a H adatom on S-1, S-2, and S-3, respectively (see Fig. 3a for the meanings of S-1, S-2, and S-3).

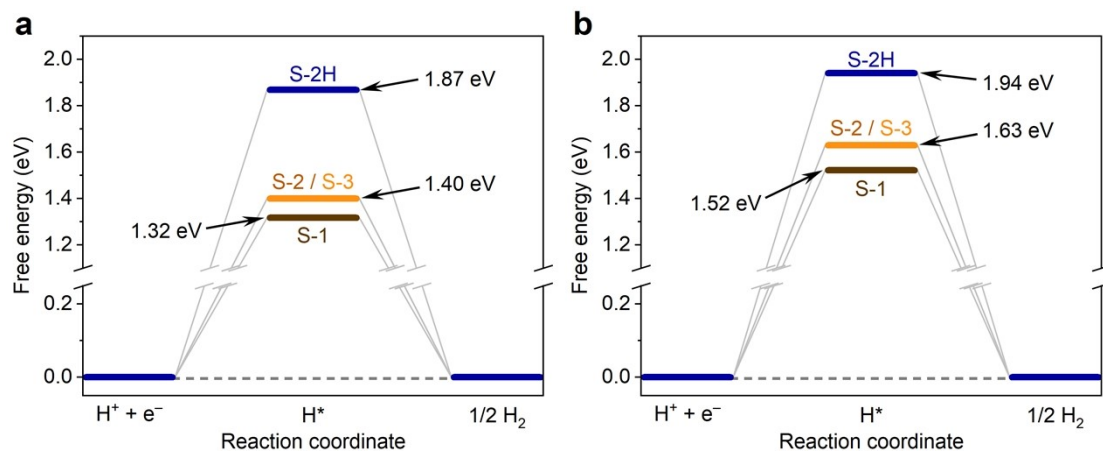

**Fig. S9** Free energy diagrams of the HER proceeding on 2H-MoS<sub>2</sub> with (a) 1.5% tensile strain and (b) 1.5% compressive strain at  $U = 0$  V. S-2H represents the surface S atom of 2H-MoS<sub>2</sub>, and S-1, S-2, and S-3 represent the S atoms adjacent to the vacancy (see Fig. 3a for the positions of the S atoms relative to the vacancy).

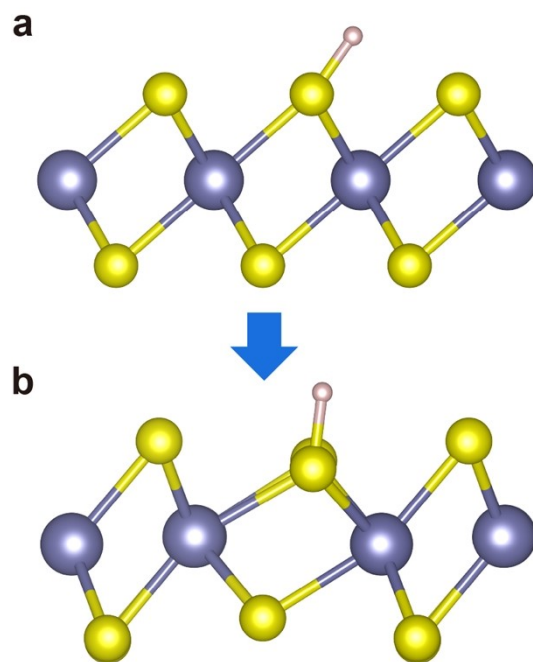

**Fig. S10** H adsorption-induced phase transition from (a) 1T-MoS<sub>2</sub> to (b) 1T'-MoS<sub>2</sub>.

**Table S2** Theoretical values of the frequencies of  $\nu(\text{S-H})$  on the basal plane and the near-S-vacancy S atom of  $2\text{H-MoS}_2$  with 1.5% tensile strain and 1.5% compressive strain. Mode I and Mode II represent the non-perpendicular and perpendicular adsorption modes, respectively (see Fig. 2d and e for the difference of two modes). S-v represents the near-S-vacancy S atom. Notably, since the non-perpendicular adsorption of the H atom cannot exist stably on S-v, the non-perpendicular mode was not considered for the adsorption of the H atom on S-v.

| Adsorption<br>Strain | Basal Plane           |                       | S-v                   |
|----------------------|-----------------------|-----------------------|-----------------------|
|                      | Mode I                | Mode II               |                       |
| 1.5%                 | 1981 $\text{cm}^{-1}$ | 2039 $\text{cm}^{-1}$ | 2317 $\text{cm}^{-1}$ |
| -1.5%                | 1924 $\text{cm}^{-1}$ | 2028 $\text{cm}^{-1}$ | 2227 $\text{cm}^{-1}$ |

**Table S3** Theoretical values of the frequencies of  $\nu(\text{S-D})$  on the basal plane and the near-S-vacancy S atom of 2H-MoS<sub>2</sub> with 1.5% tensile strain and 1.5% compressive strain. Mode I and Mode II represent the non-perpendicular and perpendicular adsorption modes, respectively (see Fig. 2d and e for the difference of two modes). S-v represents the near-S-vacancy S atom. Notably, since the non-perpendicular adsorption of the D atom cannot exist stably on S-v, the non-perpendicular mode was not considered for the adsorption of the D atom on S-v.

| Strain \ Adsorption | Basal Plane           |                       | S-v                   |
|---------------------|-----------------------|-----------------------|-----------------------|
|                     | Mode I                | Mode II               |                       |
| 1.5%                | 1418 cm <sup>-1</sup> | 1465 cm <sup>-1</sup> | 1664 cm <sup>-1</sup> |
| -1.5%               | 1376 cm <sup>-1</sup> | 1454 cm <sup>-1</sup> | 1598 cm <sup>-1</sup> |

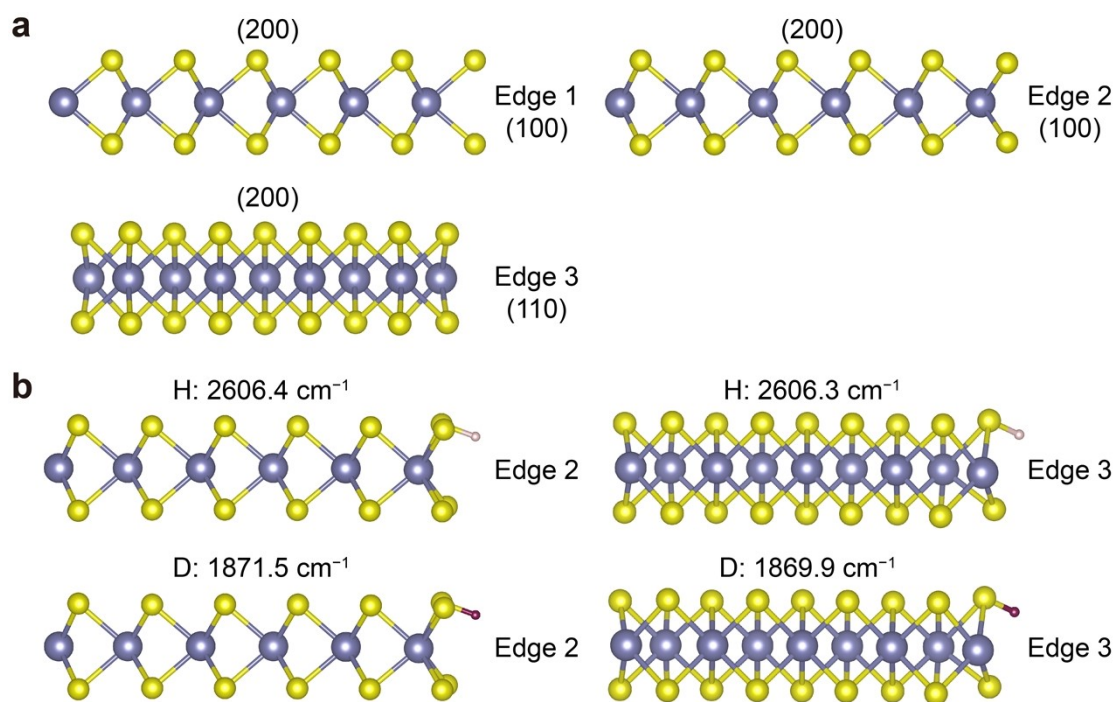

**Fig. S11** (a) Edges of 2H-MoS<sub>2</sub> corresponding to the (100) and (110) crystal planes. It is worth emphasizing that the (200) plane corresponds to the basal plane of 2H-MoS<sub>2</sub>. (b) Theoretical values of the frequencies of  $\nu(\text{S-H})$  and  $\nu(\text{S-D})$  on Edge 2 and Edge 3.

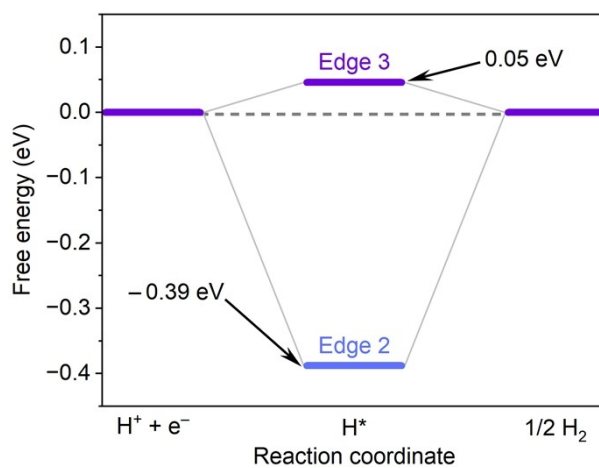

**Fig. S12** Free energy diagrams of the HER proceeding on Edge 2 and Edge 3 (Fig. S11a) at  $U = 0$  V.



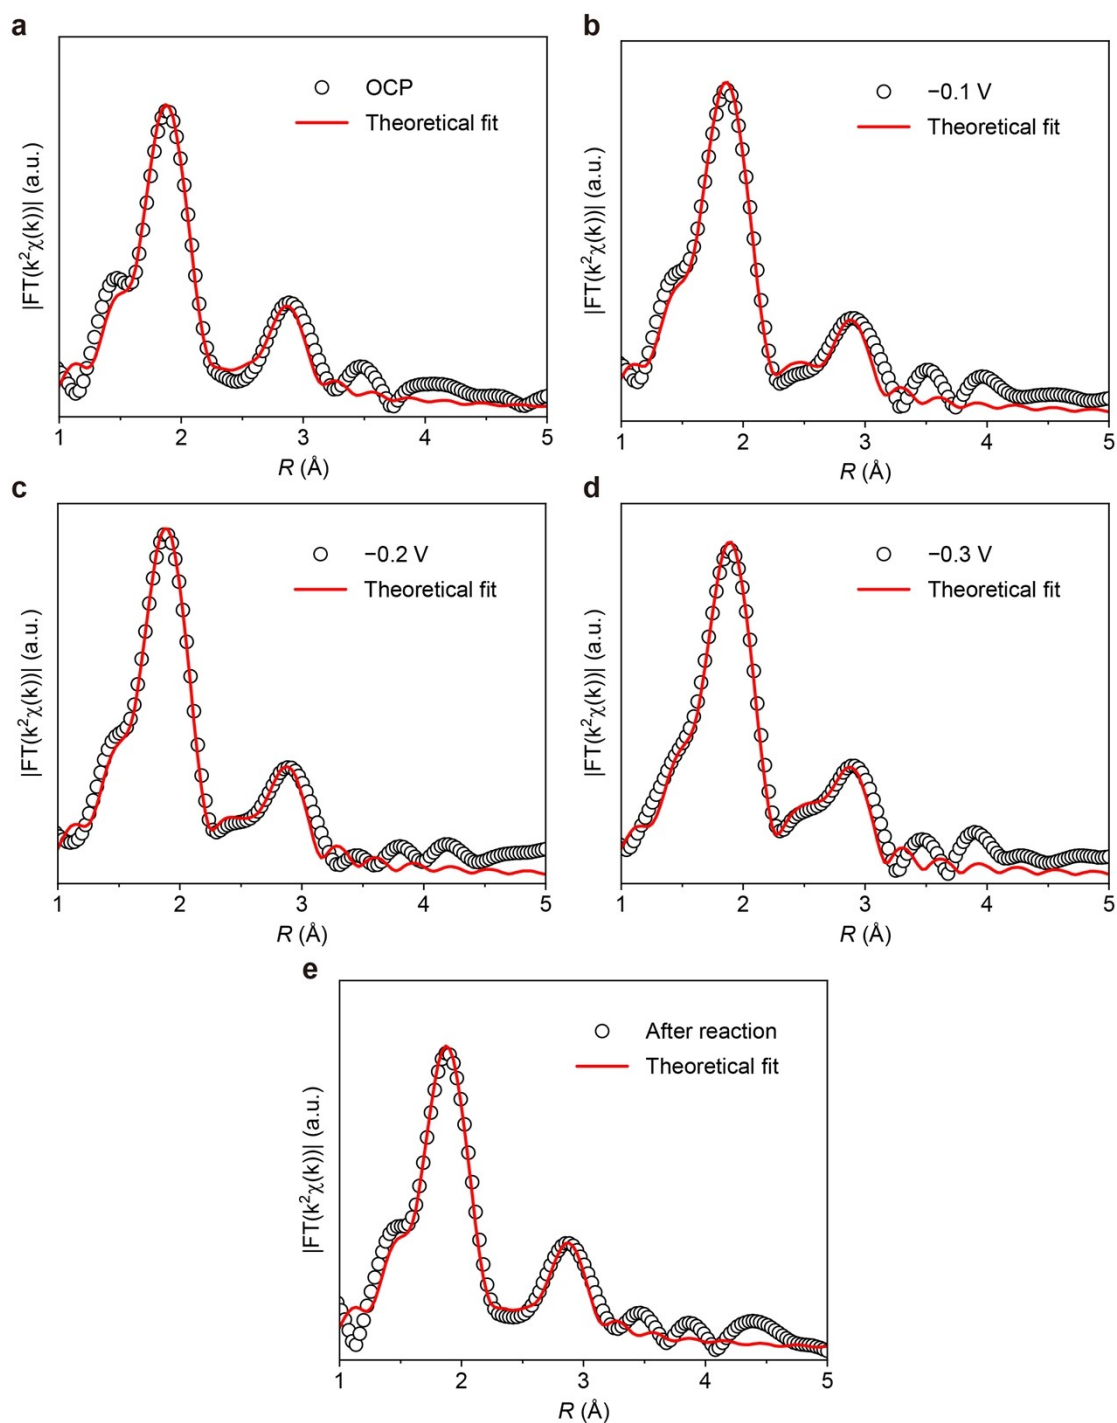

**Fig. S13** Experimental and best-fitted EXAFS spectra in  $R$  space for  $\text{MoS}_2$  at (a) OCP, (b) at  $-0.1\text{V}$ , (c) at  $-0.2\text{V}$ , (d) at  $-0.3\text{V}$ , and (e) after the reaction. The peak position in the  $R$  space does not represent the real bond length. The real bond length can be derived by fitting the EXAFS spectra (see Table S4 for the real bond length).

**Table S4** Mo K-edge EXAFS curve fitting parameters.

| Sample         | Shell  | $N$      | $D$ (Å)   | $\Delta\sigma^2*10^3$<br>(Å <sup>2</sup> ) | $\Delta E_0$<br>(eV) | R-factor<br>(%) |
|----------------|--------|----------|-----------|--------------------------------------------|----------------------|-----------------|
| Mo foil        | Mo-Mo1 | 8.0(set) | 2.72±0.01 | 3.83±0.72                                  | -7.8±0.8             | 0.3             |
|                | Mo-Mo2 | 6.0(set) | 3.13±0.01 | 3.25±0.98                                  | -7.8±0.8             |                 |
| OCP            | Mo-S   | 4.1±0.4  | 2.40±0.01 | 2.17±0.82                                  | -0.5±0.6             | 1.3             |
|                | Mo-Mo  | 1.5±0.2  | 3.14±0.02 | 2.37±1.10                                  | -3.7±1.8             |                 |
| -0.1V          | Mo-S   | 4.8±0.5  | 2.39±0.01 | 3.50±1.56                                  | -0.3±0.9             | 1.4             |
|                | Mo-Mo  | 1.5±0.2  | 3.14±0.02 | 3.65±1.60                                  | -3.6±2.6             |                 |
| -0.2V          | Mo-S   | 4.7±0.4  | 2.40±0.02 | 8.15±1.03                                  | 0.3±1.2              | 0.9             |
|                | Mo-Mo1 | 0.3±0.1  | 2.76±0.03 | 2.04±1.37                                  | 6.1±2.8              |                 |
|                | Mo-Mo2 | 1.6±0.2  | 3.14±0.03 | 8.15±1.16                                  | -2.8±3.2             |                 |
| -0.3V          | Mo-S   | 4.9±0.5  | 2.40±0.02 | 7.87±3.66                                  | 0.9±0.9              | 0.1             |
|                | Mo-Mo1 | 0.6±0.1  | 2.77±0.03 | 6.36±5.69                                  | 6.2±6.4              |                 |
|                | Mo-Mo2 | 1.5±0.2  | 3.14±0.02 | 1.04±0.97                                  | -2.6±2.2             |                 |
| After reaction | Mo-S   | 4.1±0.4  | 2.40±0.02 | 2.07±0.95                                  | -0.3±0.9             | 1.5             |
|                | Mo-Mo  | 1.5±0.2  | 3.14±0.03 | 2.64±1.10                                  | -2.9±2.0             |                 |

$N$ ,  $D$ ,  $\sigma^2$ ,  $\Delta E_0$ , and R-factor represent the coordination number, the distance between absorber and backscatter atoms (*i.e.*, the bond length), Debye-Waller factor to account for both thermal and structural disorders, inner potential correction, and the goodness-of-fit, respectively. The data ranges for the fitting in k-space and R-space are  $2.3 \leq k$  (Å<sup>-1</sup>)  $\leq 12.5$  and  $1.2 \leq R$  (Å)  $\leq 3.2$ , respectively. The obtained  $S_0^2$  of Mo foil was 0.95, and it was fixed in the subsequent fitting for Mo K-edge.

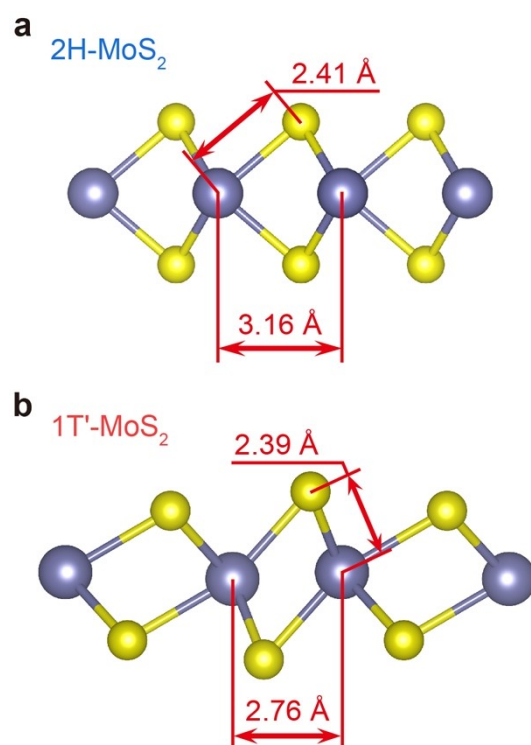

**Fig. S14** (a) Theoretical lengths of the Mo-S and Mo-Mo bonds of 2H-MoS<sub>2</sub>. (b) Theoretical lengths of the Mo-S and Mo-Mo bonds of 1T'-MoS<sub>2</sub>. The structures of 2H-MoS<sub>2</sub> and 1T'-MoS<sub>2</sub> have been optimised through first-principles calculations.

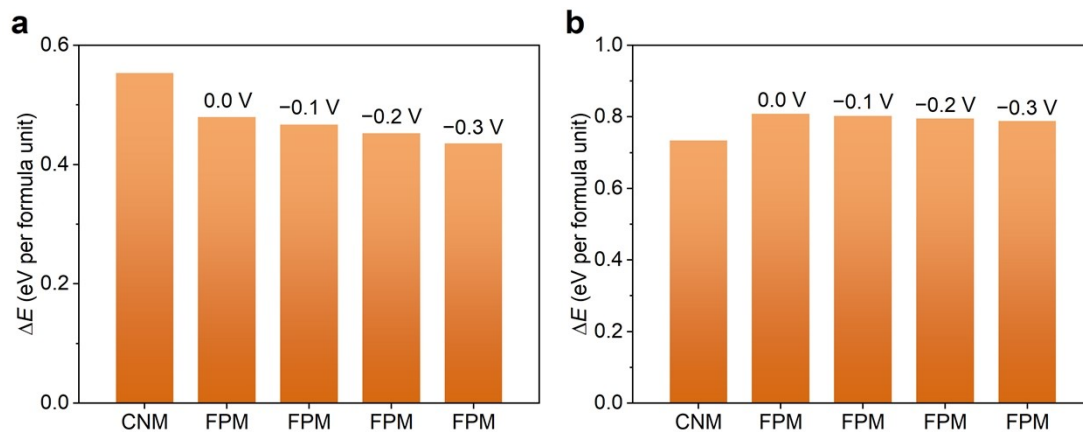

**Fig. S15** Energy differences (a) between 2H-MoS<sub>2</sub> and 1T'-MoS<sub>2</sub> and (b) between 2H-MoS<sub>2</sub> and 1T-MoS<sub>2</sub>. The results were calculated based on either the CNM method or the FPM method. The 1T phase transforms to the 1T' phase with the adsorption of the H atom (Fig. S10). Therefore, there is a possibility that the 2H-to-1T phase transition first occurs and then the 1T phase is changed into the 1T' phase by the H adatom. Comparing the results in (a) and (b), it can be concluded that the 1T' phase exhibits higher stability compared with the 1T phase. These results show that the 2H-to-1T phase transition does not occur prior to the 2H-to-1T' phase transition.
